# Supplementary material
Source: Royal Society of Chemistry journal article supplement (doi:10.1039/d6nr00641h)
Supplement: d6nr00641h1.pdf [file d6nr00641h1.pdf]

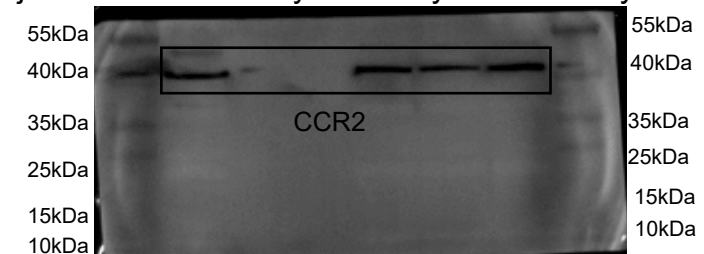

RAW ST PT MPT MST MM

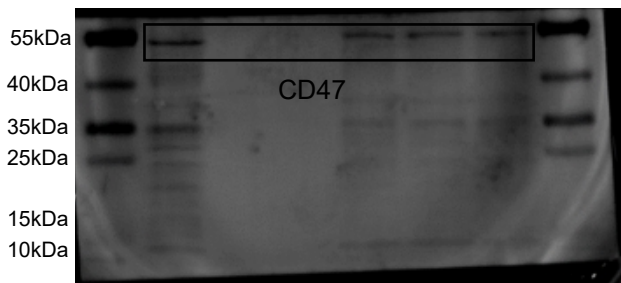

RAW ST PT MPT MSTMM

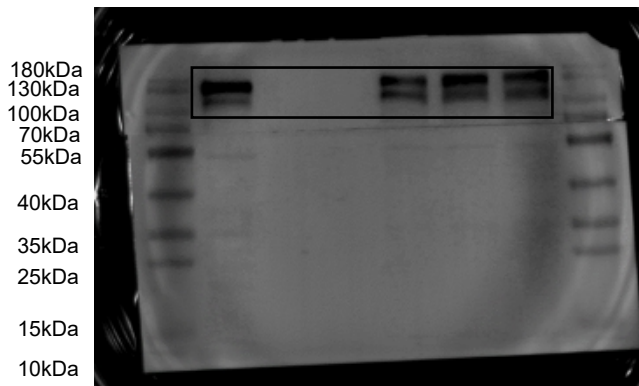

integrin  $\beta 1$

Fig. 2 B Western blots of integrin  $\beta 1$ , CCR2 and CD47 proteins in RAW264.7, MM, PT, ST, MPT or MST.
