# Supplementary material
Source: Royal Society of Chemistry journal article supplement (doi:10.1039/d6nr00641h)
Supplement: d6nr00641h2.pdf [file d6nr00641h2.pdf]

1

## Supplementary Information

2 **Targeted delivery and ROS-responsive release of celastrol by**  
3 **macrophage membrane biomimetic liposome alleviates acute kidney**  
4 **injury**

5

6 Guangqin Cheng<sup>a,&</sup>, Dongxu Bai<sup>a,&</sup>, Weiyi Chen<sup>a,&</sup>, Junmei Wang<sup>a</sup>, Jian Xu<sup>a</sup>,  
7 Yongping Zhang<sup>a</sup>, Lin Li<sup>d</sup>, Qing Lin<sup>d</sup>, Zhirong Zhang<sup>d</sup>, Jinghua Ruan<sup>c,\*</sup>, Ling  
8 Zhang<sup>b,\*</sup>, Ling Guo<sup>a,\*</sup>

9

10 <sup>a</sup>National Engineering Technology Research Center for Miao Medicine, Guizhou Engi  
11 neering Technology Research Center for Processing and Preparation of Traditional Ch  
12 inese Medicine and Ethnic Medicine, College of Pharmaceutical Sciences, Guizhou U  
13 niversity of Traditional Chinese Medicine, Guiyang, 550025, P. R. China.

14

15 <sup>b</sup>College of Polymer Science and Engineering, West China School of Public Health,  
16 Med-X center of materials, Sichuan University, Chengdu, 610065, P. R. China.

17

18 <sup>c</sup>The First Affiliated Hospital, Guizhou University of Traditional Chinese Medicine,  
19 Guiyang 550001, P. R. China.

20

21 <sup>d</sup>West China School of Pharmacy, Key Laboratory of Drug-Targeting and Drug  
22 Delivery System of the Education Ministry, Sichuan Engineering Laboratory for  
23 Plant-Sourced Drug and Sichuan Research Center for Drug Precision Industrial  
24 Technology, Sichuan University, Chengdu, 610041, P. R. China.

25

26

27

28 &These authors contributed equally: Guangqin Cheng, Dongxu Bai, Weiyi Chen

29

30 \*Corresponding authors. E-mail address: RJH7737@163.com (Jinghua Ruan);  
31 zhangling83@scu.edu.cn (Ling Zhang); guoling032@gzy.edu.cn (Ling Guo).

32

33 Supplemental Figures.

34

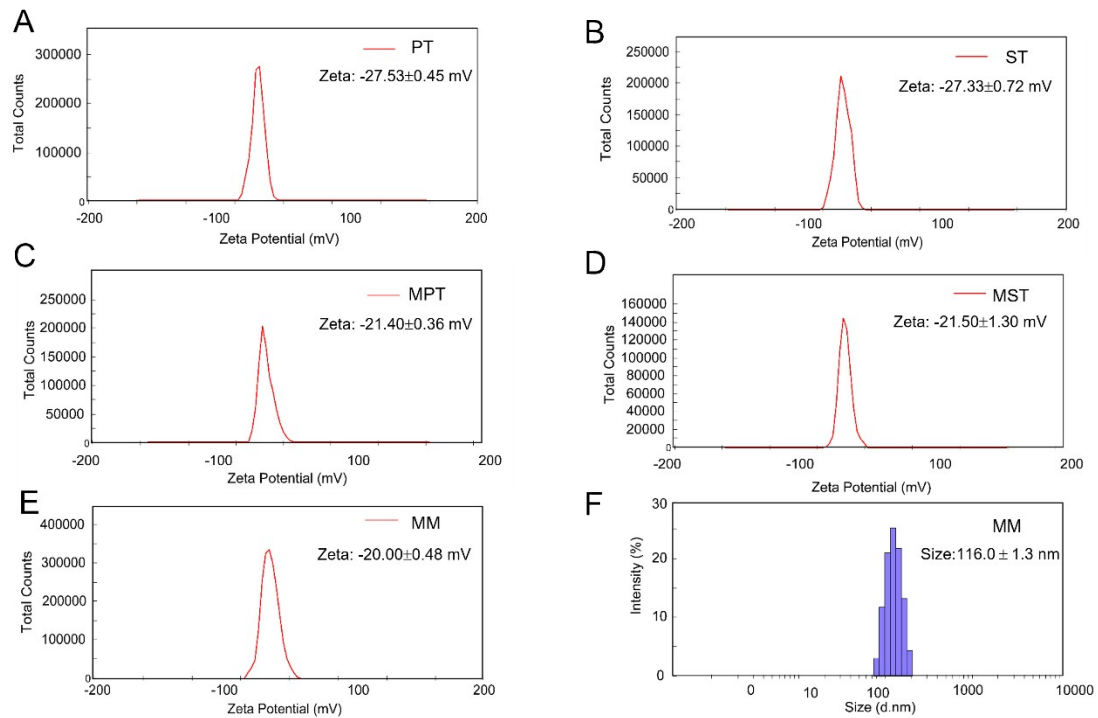

35

36 **Figure S1. Characterization of MM and CLT formulations.** (A-E) Zeta potential  
37 of PT, ST, MPT, MST, and MM measured by dynamic light scattering. (F) Particle  
38 size and size distribution of MM measured by dynamic light scattering. Data are  
39 mean  $\pm$  S.D. (n = 3).

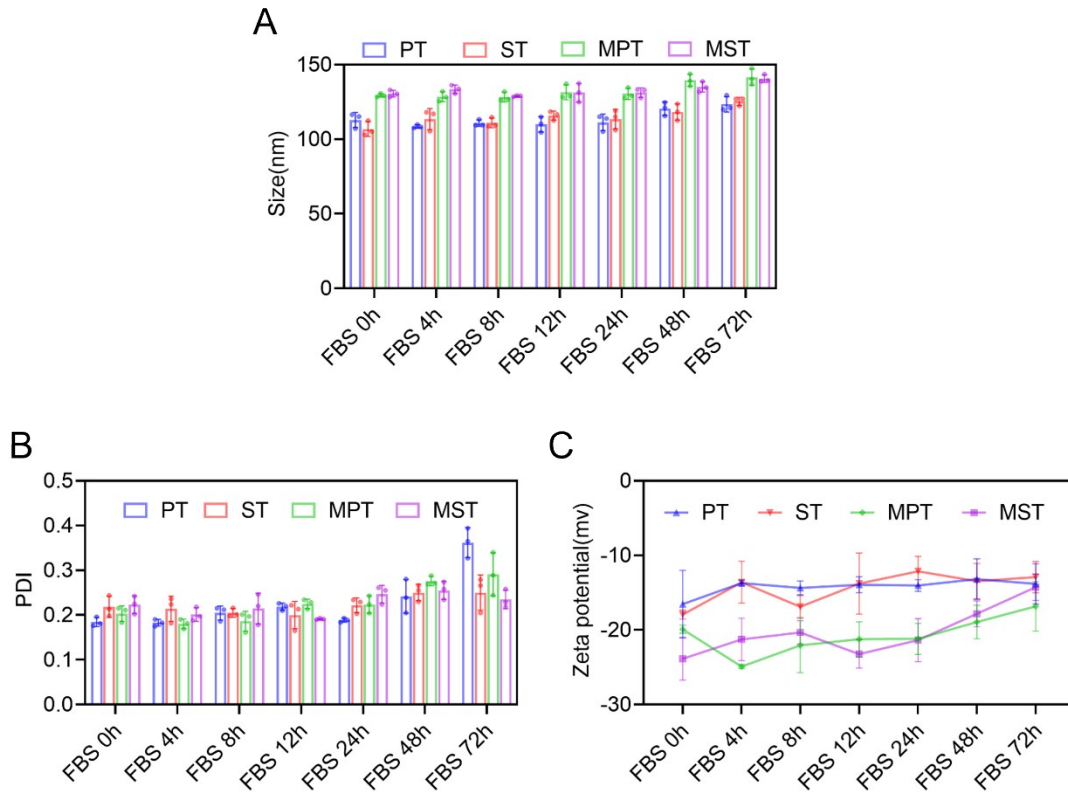

40

41 **Figure S2. The serum stability of CLT formulations.** (A-C) The variations in  
 42 particle size, zeta potential, and PDI of PT, ST, MPT or MST after incubation with an  
 43 equal volume (v/v) of FBS for 72 h. Data are mean  $\pm$  S.D. (n = 3).

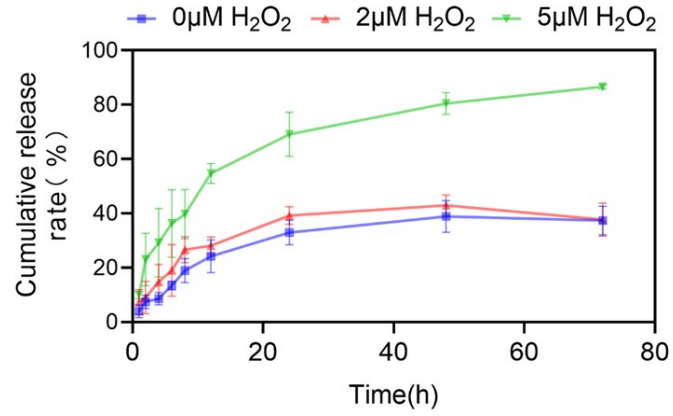

44

45 **Figure S3.** *In vitro* release profile of ST were evaluated in the presence of 0, 2, and 5  
46 μM H<sub>2</sub>O<sub>2</sub>. Data are mean ± S.D. (n = 3).

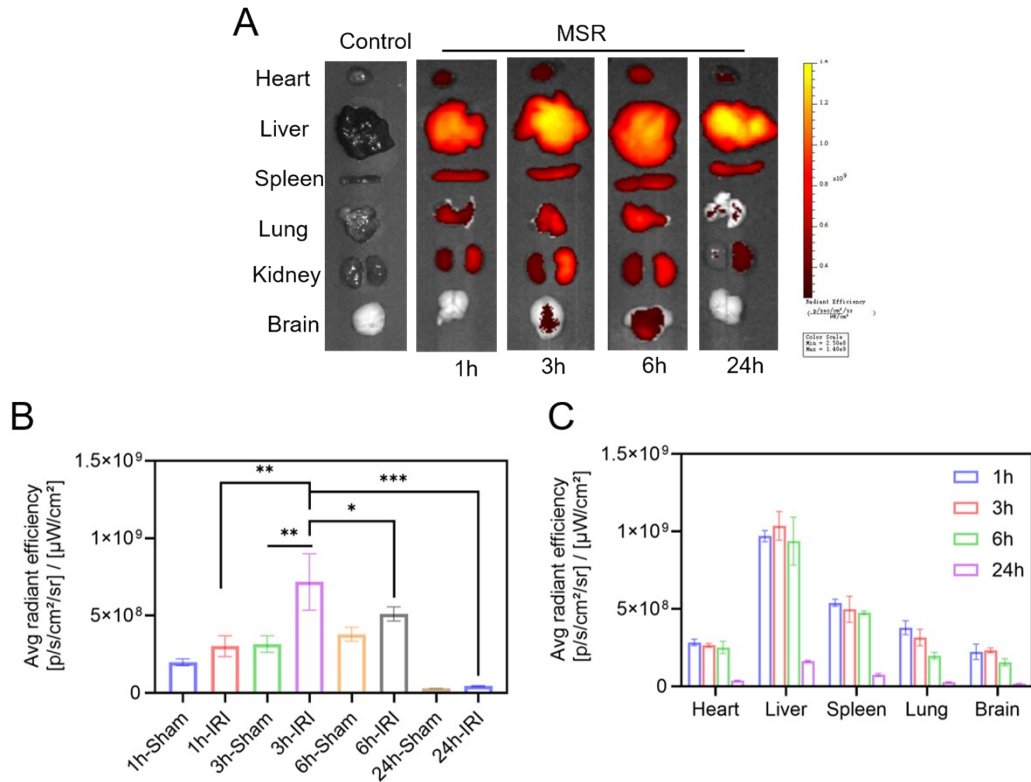

47

48 **Figure S4. *In vivo* biodistribution of MSR in unilateral IRI mice.** (A-C) The  
 49 biodistribution and quantification of MSR accumulated in major organs were assessed  
 50 at 1, 3, 6, and 24 h following intravenous administration. Data are mean  $\pm$  S.D. (n = 3).  
 51 \* P < 0.05, \*\* P < 0.01, \*\*\* P < 0.001. Statistical significance was determined by  
 52 one-way ANOVA with Tukey *post hoc* test.

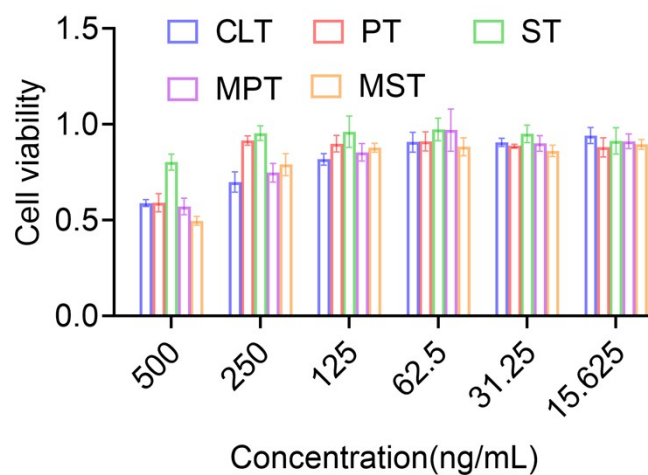

54

55 **Figure S5. The cytotoxicity of CLT formulations on HK-2 cells.** The HK-2 cell  
56 viability after incubating with various concentration of CLT, PT, ST, MPT, or MST  
57 for 24 h evaluated using the CCK-8 assay. Data are mean  $\pm$  S.D. (n = 5).

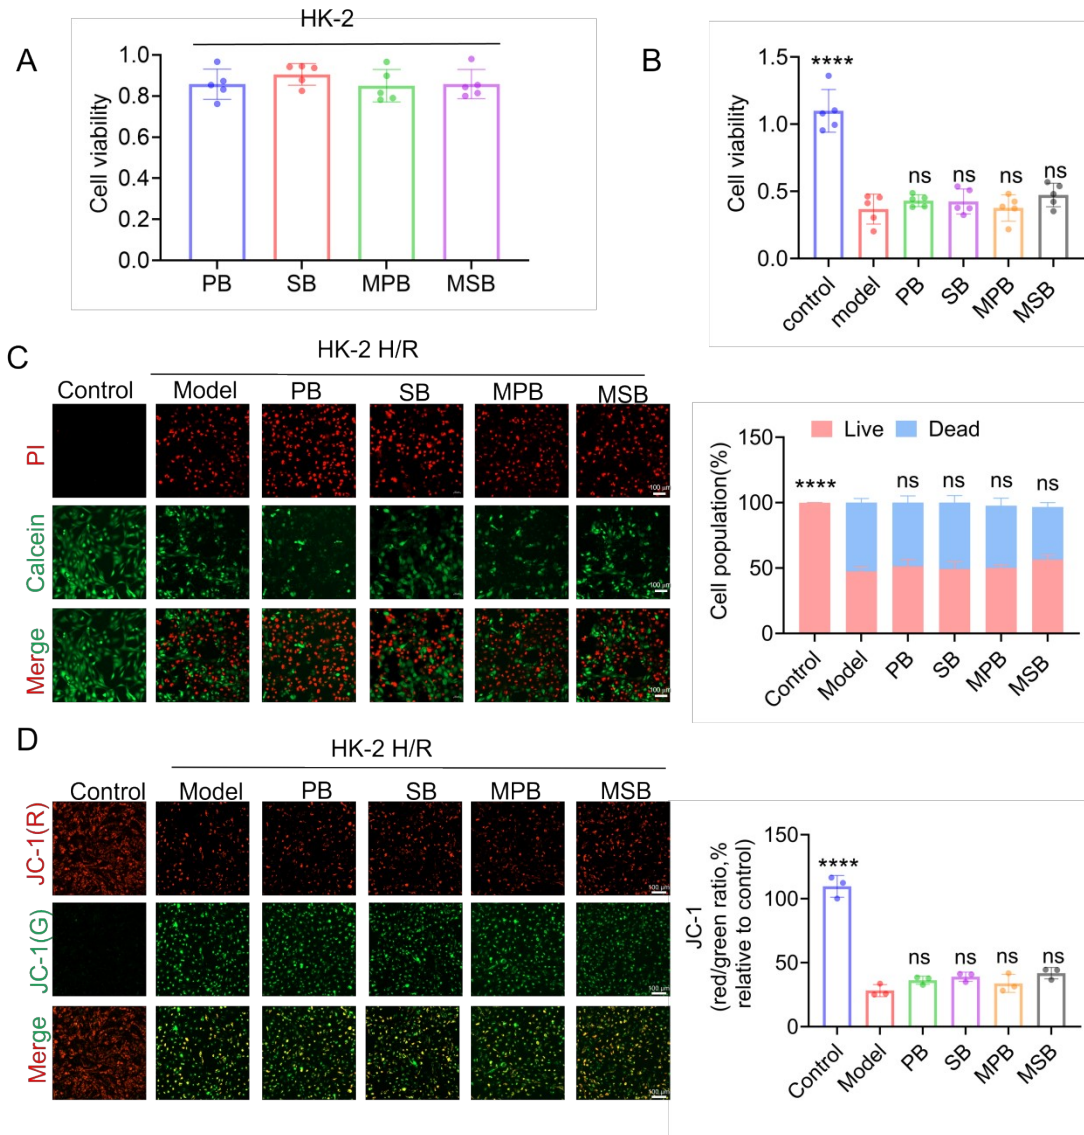

58

59 **Figure S6. *In vitro* cytoprotective activities of PB, SB, MPB, and MSB.** (A) The  
 60 HK-2 cell viability after incubating with PB, SB, MPB, and MSB for 24 h evaluated  
 61 using the CCK-8 assay (n = 5). (B) Cell viability of H/R treated HK-2 cells incubated  
 62 with blank formulations (n = 5). (C) CLSM images and the semi-quantitative analysis  
 63 of live and dead cells in H/R treated HK-2 cells stained with Calcein-AM/PI  
 64 following various treatments (n = 3). Scale bar = 100  $\mu$ m. (D) CLSM images and the  
 65 semi-quantitative analysis of mitochondrial membrane potential in H/R treated HK-2  
 66 cells stained with JC-1 following various treatments (n = 3). Scale bar = 100  $\mu$ m. Data  
 67 are mean  $\pm$  S.D., compared to the model group, \*\*\*\* P < 0.0001. ns, not significant.  
 68 Statistical significance was determined by one-way ANOVA with Tukey *post hoc* test.

69

70

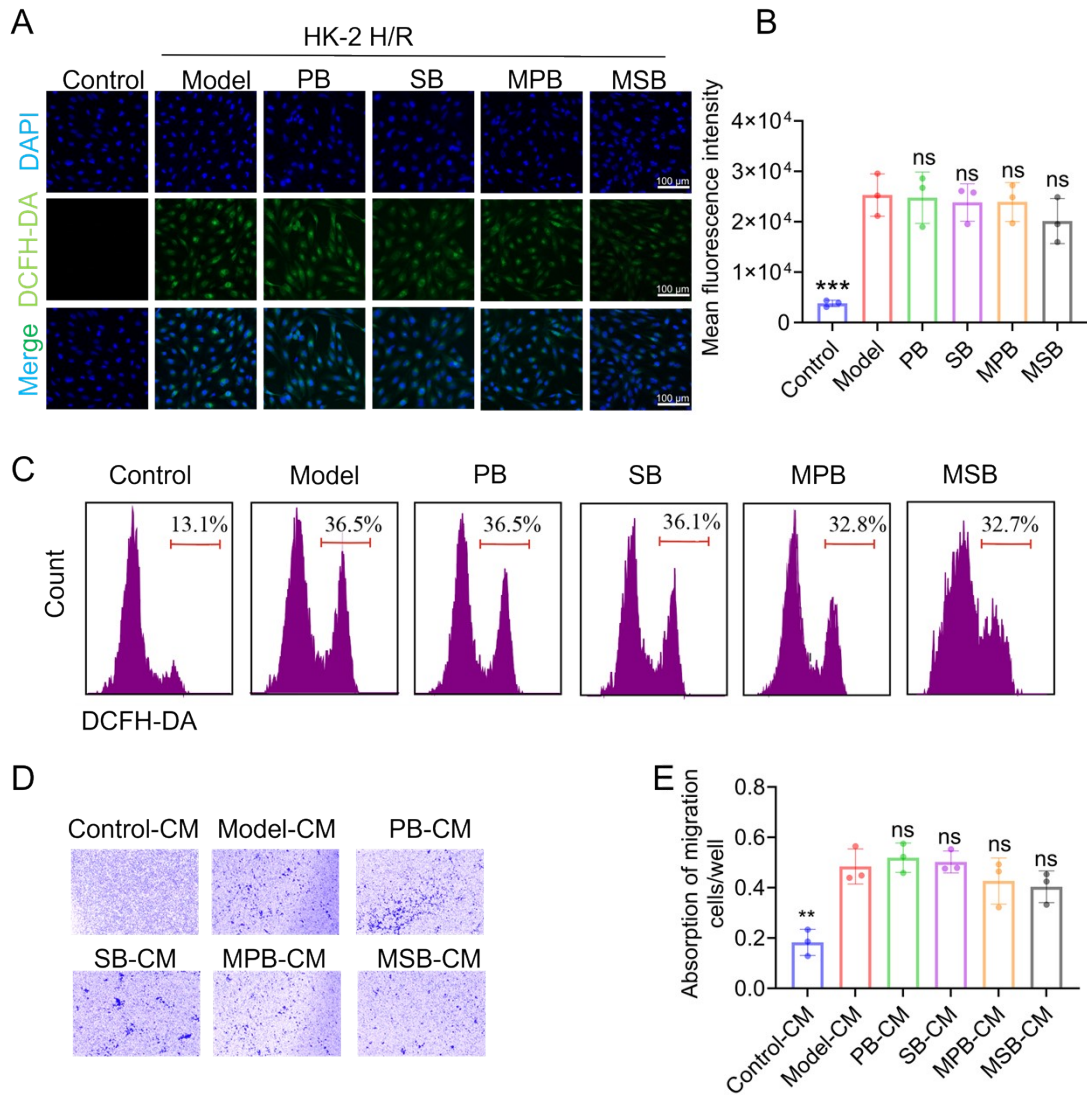

71  
 72 **Figure S7. In vitro anti-oxidant and anti-inflammatory activities of PB, SB, MPB,**  
 73 **and MSB.** (A) CLSM images of intracellular ROS in H/R treated HK-2 cells  
 74 following various treatments. Scale bar = 100 μm. (B) quantitative results and (C)  
 75 FACS analysis of ROS level in H/R treated HK-2 cells following various treatments  
 76 (n = 3). (D) Representative images of migrated THP-1 macrophages subjected to  
 77 various CM. (E) Semi-quantitative analysis of macrophage migration (n = 3). Data are  
 78 mean ± S.D., compared to the model group, \* P < 0.05, \*\* P < 0.01, \*\*\* P < 0.001. ns,  
 79 not significant. Statistical significance was determined by one-way ANOVA with  
 80 Tukey *post hoc* test.

81  
 82  
 83  
 84  
 85  
 86  
 87  
 88

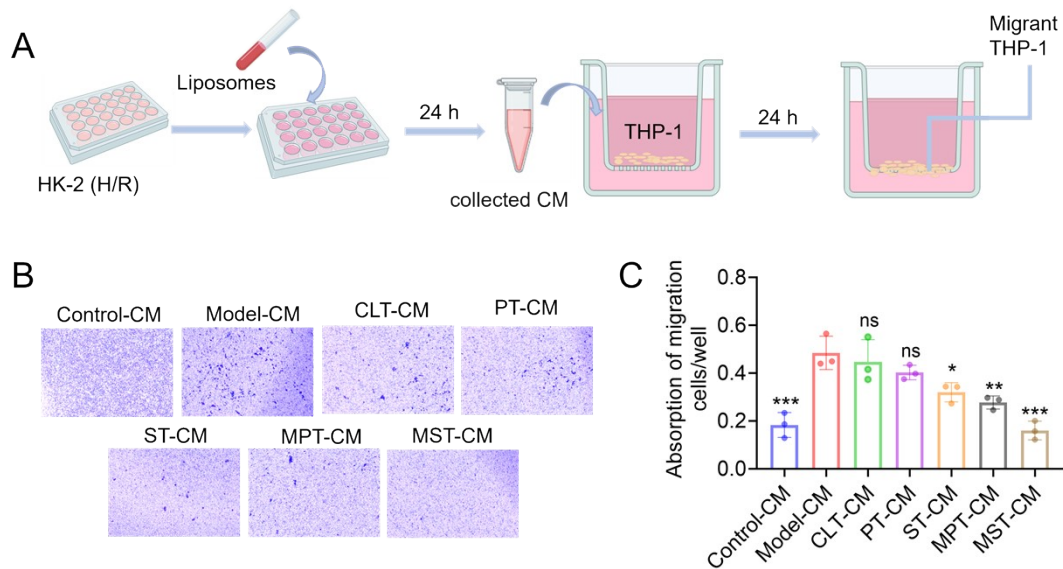

89

90 **Figure S8. Evaluation of the anti-inflammatory effect of MST *in vitro*.** (A)

91 Schematic illustration of the experimental procedure for collecting CM and

92 conducting the Transwell migration assay. (B) Representative images of migrated

93 THP-1 macrophages subjected to various CM. (C) Semi-quantitative analysis of

94 macrophage migration. Data are mean  $\pm$  S.D. (n = 3). Compared to the model-CM

95 group, \* P < 0.05, \*\* P < 0.01, \*\*\* P < 0.001. ns, not significant. Statistical

96 significance was determined by one-way ANOVA with Tukey *post hoc* test.

97

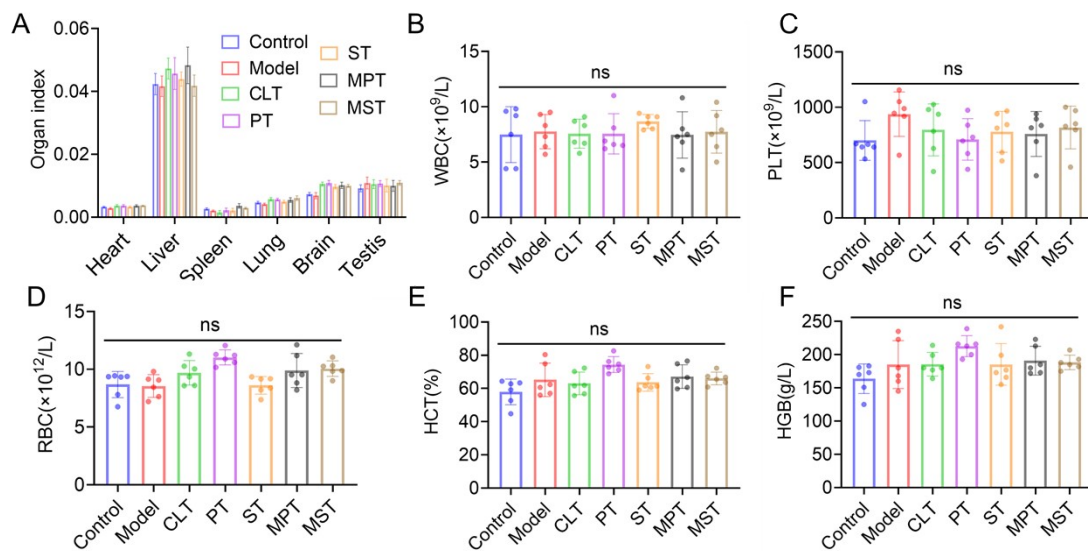

100 **Figure S9. The biosafety evaluation of CLT formulations.** (A) The changes in the  
 101 organ index of following intravenous administration of saline, CLT, PT, ST, MPT or  
 102 MST. (B–F) WBC, PLT, RBC, HCT and HGB levels in blood of rats following  
 103 intravenous administration of saline, CLT, PT, ST, MPT or MST. Data are mean  $\pm$   
 104 S.D. (n = 6). ns, not significant. Statistical significance was determined by one-way  
 105 ANOVA with Tukey *post hoc* test.
